# Supplementary material
Source: PubMed Central journal article supplement (PMC3045468)
Supplement: NIHMS266740-supplement-1_si_001.pdf [file NIHMS266740-supplement-1_si_001.pdf]

# Supporting Information for

## Nitric Oxide-Releasing Electrospun Polymer Microfibers

*Peter N. Coneski, Jessica A. Nash and Mark H. Schoenfisch\**

Department of Chemistry, University of North Carolina at Chapel Hill, Chapel Hill, North  
Carolina 27599-3290, United States

**Table 1.** Flow rate dependence on electrospun fiber diameter.

| Polymer               | Weight Percent<br>(%)   | Flow Rate<br>( $\mu\text{L min}^{-1}$ ) | Diameter<br>(nm) |
|-----------------------|-------------------------|-----------------------------------------|------------------|
| Tecoflex Polyurethane | 8                       | 15                                      | <i>b</i>         |
|                       | 8                       | 50                                      | 454 $\pm$ 188    |
|                       | 8                       | 100                                     | 392 $\pm$ 147    |
|                       | 12                      | 15                                      | 1103 $\pm$ 601   |
|                       | 12                      | 50                                      | 947 $\pm$ 283    |
|                       | 12                      | 100                                     | 1006 $\pm$ 512   |
|                       | 16                      | 15                                      | 2025 $\pm$ 527   |
|                       | 16                      | 50                                      | 1788 $\pm$ 676   |
|                       | 16                      | 100                                     | 2974 $\pm$ 1032  |
|                       | Tecophilic Polyurethane | 8                                       | 15               |
| 8                     |                         | 50                                      | 347 $\pm$ 104    |
| 8                     |                         | 100                                     | 384 $\pm$ 143    |
| 12                    |                         | 15                                      | 621 $\pm$ 185    |
| 12                    |                         | 50                                      | 626 $\pm$ 182    |
| 12                    |                         | 100                                     | 827 $\pm$ 196    |
| 16                    |                         | 15                                      | 719 $\pm$ 168    |
| 16                    |                         | 50                                      | 1244 $\pm$ 180   |
| 16                    |                         | 100                                     | 1745 $\pm$ 296   |
| Poly(vinyl chloride)  |                         | 8                                       | 15               |
|                       | 8                       | 50                                      | 164 $\pm$ 75     |
|                       | 8                       | 100                                     | 210 $\pm$ 109    |
|                       | 12                      | 15                                      | 418 $\pm$ 210    |
|                       | 12                      | 50                                      | 596 $\pm$ 337    |
|                       | 12                      | 100                                     | 1174 $\pm$ 626   |
|                       | 16                      | 15                                      | 524 $\pm$ 174    |
|                       | 16                      | 50                                      | 531 $\pm$ 160    |
|                       | 16                      | 100                                     | 726 $\pm$ 281    |

*b*-electrospinning resulted in the formation of beaded fibers.

**Table 2.** Influence of needle gauge on electrospun fiber diameters.

| Polymer                 | Weight Percent<br>(%) | Needle Gauge | Flow Rate<br>( $\mu\text{L min}^{-1}$ ) | Diameter<br>(nm) |
|-------------------------|-----------------------|--------------|-----------------------------------------|------------------|
| Tecoflex Polyurethane   | 8                     | 18           | 15                                      | <i>b</i>         |
|                         | 8                     | 22           | 15                                      | <i>b</i>         |
|                         | 8                     | 30           | 15                                      | <i>b</i>         |
|                         | 12                    | 18           | 15                                      | 1307 $\pm$ 635   |
|                         | 12                    | 22           | 15                                      | 1103 $\pm$ 601   |
|                         | 12                    | 30           | 15                                      | 1283 $\pm$ 275   |
|                         | 16                    | 18           | 15                                      | 1544 $\pm$ 698   |
|                         | 16                    | 22           | 15                                      | 2025 $\pm$ 527   |
|                         | 16                    | 30           | 15                                      | 1472 $\pm$ 727   |
| Tecophilic Polyurethane | 8                     | 18           | 15                                      | 446 $\pm$ 139    |
|                         | 8                     | 22           | 15                                      | 334 $\pm$ 77     |
|                         | 8                     | 30           | 15                                      | 396 $\pm$ 81     |
|                         | 12                    | 18           | 15                                      | 667 $\pm$ 179    |
|                         | 12                    | 22           | 15                                      | 621 $\pm$ 185    |
|                         | 12                    | 30           | 15                                      | 445 $\pm$ 122    |
|                         | 16                    | 18           | 15                                      | 1334 $\pm$ 180   |
|                         | 16                    | 22           | 15                                      | 719 $\pm$ 168    |
|                         | 16                    | 30           | 15                                      | 730 $\pm$ 79     |
| Poly(vinyl chloride)    | 8                     | 18           | 15                                      | 185 $\pm$ 73     |
|                         | 8                     | 22           | 15                                      | 125 $\pm$ 47     |
|                         | 8                     | 30           | 15                                      | 178 $\pm$ 65     |
|                         | 12                    | 18           | 15                                      | 357 $\pm$ 128    |
|                         | 12                    | 22           | 15                                      | 418 $\pm$ 210    |
|                         | 12                    | 30           | 15                                      | 394 $\pm$ 144    |
|                         | 16                    | 18           | 15                                      | 561 $\pm$ 166    |
|                         | 16                    | 22           | 15                                      | 524 $\pm$ 174    |
|                         | 16                    | 30           | 15                                      | <i>c</i>         |

*b*-electrospinning resulted in the formation of beaded fibers.

*c*- resulted in capillary clogging, no fiber formation.

**Table 3.** Influence of dopant type on conductivity of electrospinning solutions.

| Polymer solution | Dopant        | Solution Conductivity<br>( $\mu\text{S cm}^{-1}$ ) |
|------------------|---------------|----------------------------------------------------|
| 8% Tecoflex      | -             | 2.3 $\pm$ 0.4                                      |
| 8% Tecoflex      | 0.4% proline  | 2.4 $\pm$ 0.3                                      |
| 8% Tecoflex      | 0.8% proline  | 1.9 $\pm$ 0.2                                      |
| 8% Tecoflex      | 1.6% proline  | 1.7 $\pm$ 0.2                                      |
| 8% Tecoflex      | 0.4% PROLI/NO | 146.2 $\pm$ 13.1                                   |
| 8% Tecoflex      | 0.8% PROLI/NO | 124.1 $\pm$ 20.4                                   |
| 8% Tecoflex      | 1.6% PROLI/NO | 159.4 $\pm$ 1.8                                    |
| 12% Tecoflex     | -             | 1.4 $\pm$ 0.1                                      |
| 12% Tecoflex     | 0.6% proline  | 6.8 $\pm$ 0.7                                      |
| 12% Tecoflex     | 1.2% proline  | 7.7 $\pm$ 0.3                                      |
| 12% Tecoflex     | 2.4% proline  | 17.1 $\pm$ 4.3                                     |
| 12% Tecoflex     | 0.6% PROLI/NO | 136.8 $\pm$ 3.1                                    |
| 12% Tecoflex     | 1.2% PROLI/NO | 102.0 $\pm$ 1.6                                    |
| 12% Tecoflex     | 2.4% PROLI/NO | 157.2 $\pm$ 2.4                                    |
| 16% Tecoflex     | -             | 2.5 $\pm$ 0.4                                      |
| 16% Tecoflex     | 0.8% proline  | 3.5 $\pm$ 0.5                                      |
| 16% Tecoflex     | 1.6% proline  | 3.4 $\pm$ 0.6                                      |
| 16% Tecoflex     | 3.2% proline  | 12.3 $\pm$ 3.9                                     |
| 16% Tecoflex     | 0.8% PROLI/NO | 102.7 $\pm$ 10.9                                   |
| 16% Tecoflex     | 1.6% PROLI/NO | 45.1 $\pm$ 3.1                                     |
| 16% Tecoflex     | 3.2% PROLI/NO | 112.8 $\pm$ 3.5                                    |
| 8% Tecophilic    | -             | 5.4 $\pm$ 0.1                                      |
| 8% Tecophilic    | 0.4% proline  | 3.6 $\pm$ 0.4                                      |
| 8% Tecophilic    | 0.8% proline  | 4.1 $\pm$ 0.5                                      |
| 8% Tecophilic    | 1.6% proline  | 2.6 $\pm$ 0.3                                      |
| 8% Tecophilic    | 0.4% PROLI/NO | 176.0 $\pm$ 2.9                                    |
| 8% Tecophilic    | 0.8% PROLI/NO | 128.0 $\pm$ 3.2                                    |
| 8% Tecophilic    | 1.6% PROLI/NO | 156.6 $\pm$ 3.6                                    |
| 12% Tecophilic   | -             | 4.9 $\pm$ 0.2                                      |
| 12% Tecophilic   | 0.6% proline  | 13.2 $\pm$ 3.1                                     |
| 12% Tecophilic   | 1.2% proline  | 5.7 $\pm$ 0.9                                      |
| 12% Tecophilic   | 2.4% proline  | 4.6 $\pm$ 0.6                                      |
| 12% Tecophilic   | 0.6% PROLI/NO | 238.8 $\pm$ 30.4                                   |
| 12% Tecophilic   | 1.2% PROLI/NO | 170.4 $\pm$ 10.5                                   |
| 12% Tecophilic   | 2.4% PROLI/NO | 131.0 $\pm$ 6.3                                    |
| 16% Tecophilic   | -             | 5.3 $\pm$ 0.2                                      |
| 16% Tecophilic   | 0.8% proline  | 15.7 $\pm$ 2.9                                     |
| 16% Tecophilic   | 1.6% proline  | 5.5 $\pm$ 0.1                                      |
| 16% Tecophilic   | 3.2% proline  | <i>a</i>                                           |
| 16% Tecophilic   | 0.8% PROLI/NO | 306.2 $\pm$ 44.1                                   |

|                   |               |              |
|-------------------|---------------|--------------|
| 16% Tecophilic    | 1.6% PROLI/NO | 172.2 ± 9.0  |
| 16% Tecophilic    | 3.2% PROLI/NO | <i>a</i>     |
| 8% PVC            | -             | 5.1 ± 0.1    |
| 8% PVC            | 0.4% proline  | 6.9 ± 1.1    |
| 8% PVC            | 0.8% proline  | 4.4 ± 0.3    |
| 8% PVC            | 1.6% proline  | 28.9 ± 9.0   |
| 8% PVC            | 0.4% PROLI/NO | 168.6 ± 14.6 |
| 8% PVC            | 0.8% PROLI/NO | 203.0 ± 8.0  |
| 8% PVC            | 1.6% PROLI/NO | 239.6 ± 8.6  |
| 12% PVC           | -             | 13.7 ± 2.6   |
| 12% PVC           | 0.6% proline  | 5.0 ± 0.2    |
| 12% PVC           | 1.2% proline  | 4.2 ± 0.2    |
| 12% PVC           | 2.4% proline  | 7.8 ± 2.1    |
| 12% PVC           | 0.6% PROLI/NO | 153.2 ± 8.1  |
| 12% PVC           | 1.2% PROLI/NO | 190.8 ± 3.6  |
| 12% PVC           | 2.4% PROLI/NO | 201.8 ± 3.1  |
| 16% PVC           | -             | 10.7 ± 1.9   |
| 16% PVC           | 0.8% proline  | 5.4 ± 0.2    |
| 16% PVC           | 1.6% proline  | 4.6 ± 0.4    |
| 16% PVC           | 3.2% proline  | <i>a</i>     |
| 16% PVC           | 0.8% PROLI/NO | 144.4 ± 7.3  |
| 16% PVC           | 1.6% PROLI/NO | 171.2 ± 4.8  |
| 16% PVC           | 3.2% PROLI/NO | <i>a</i>     |
| Spinning Solution | -             | 3.0 ± 0.1    |

*a* – homogeneous suspensions could not be formed.
